# Supplementary material
Source: MDPI journal article supplement (https://www.mdpi.com/2077-1312/8/6/380)
Supplement: s1 [file s1]

Supplementary information

## 1. Purpose of this Document

This document details the methodology behind our physio-economic modelling for our manuscript ‘Using historical responses to shoreline change on Australia’s Gold Coast to estimate costs of coastal adaptation to sea level rise’.

## 2. Physio-Economic Modelling Method

### 2.1. Estimating Costs of Historic Responses

We first estimated the costs of historic responses to the implied sea level rise from our application of the reverse Bruun Model. With a detailed catalogue of the type and extent of works undertaken (Table 1 in main manuscript), we undertook a literature review and made personal correspondence to ascertain the costs of implementation and maintenance of equivalent coastal defence interventions from projects around the world (Supplementary Table 1). From this catalogue of interventions, we calculated high, medium, and low costs of construction and maintenance costs in 2018 dollar terms (Supplementary Table 2).

**Table 1.** Catalogue of construction and maintenance costs from around the world (normalised to 2018 USD).

| Year | Location                                  | Type        | Capital Unit Cost 2018 USD | Annual Maintenance as % of Capital | Source                                                                                                                                                                                                                                                                                                                                          |
|------|-------------------------------------------|-------------|----------------------------|------------------------------------|-------------------------------------------------------------------------------------------------------------------------------------------------------------------------------------------------------------------------------------------------------------------------------------------------------------------------------------------------|
| 2013 | Kirra Australia                           | Groyne      | \$ 26,064/m                |                                    |                                                                                                                                                                                                                                                                                                                                                 |
| 2017 | Narrowneck Australia                      | Seawall     | \$ 3,276/m                 |                                    | <a href="http://news.cityofgoldcoast.com.au/media-releases/protecting-narrowneck-future">http://news.cityofgoldcoast.com.au/media-releases/protecting-narrowneck-future</a>                                                                                                                                                                     |
| 2016 | Kurrawa Seawall Replacement               | Seawall     | \$ 4,706/m                 |                                    | <a href="http://news.cityofgoldcoast.com.au/media-releases/new-partnership-protect-kurrawa-beach">http://news.cityofgoldcoast.com.au/media-releases/new-partnership-protect-kurrawa-beach</a>                                                                                                                                                   |
| 2016 | Kingscliff Seawall + Nourishment          | Seawall     | \$ 13,061/m                |                                    | <a href="http://www.tchp.com.au/wp-content/uploads/2017/06/Kingscliff_Matters_Brochure.pdf">http://www.tchp.com.au/wp-content/uploads/2017/06/Kingscliff_Matters_Brochure.pdf</a>                                                                                                                                                               |
| 2017 | Belongil Seawall                          | Seawall     | \$ 8,735/m                 |                                    | personal Communication James Carley project designer                                                                                                                                                                                                                                                                                            |
| 2017 | Gold Coast Beach Nourishment Project 2017 | Nourishment | \$ 3/m3                    |                                    | <a href="http://www.goldcoast.qld.gov.au/gold-coast-beach-nourishment-38539.html">http://www.goldcoast.qld.gov.au/gold-coast-beach-nourishment-38539.html</a> and <a href="http://news.cityofgoldcoast.com.au/media-releases/nourishing-our-beaches-future">http://news.cityofgoldcoast.com.au/media-releases/nourishing-our-beaches-future</a> |
| 2011 | Portugal                                  | Groyne      | \$ 15,509/m                | 7%                                 | (Roebeling, et al. 2011)                                                                                                                                                                                                                                                                                                                        |
| 2011 | Portugal                                  | Nourishment | \$ 9/m3                    |                                    | (Roebeling, et al. 2011)                                                                                                                                                                                                                                                                                                                        |
| 2007 | United Kingdom                            | Seawall     | \$ 1,601/m                 | 1%                                 | (Turner et al. 2007)                                                                                                                                                                                                                                                                                                                            |
| 2016 | United Kingdom                            | Groynes     | \$ 4,317/m                 |                                    | (Williams et al. 2016)                                                                                                                                                                                                                                                                                                                          |

|      |                |         |             |    |                        |
|------|----------------|---------|-------------|----|------------------------|
| 2016 | United Kingdom | Seawall | \$ 10,073/m |    | (Williams et al. 2016) |
| 2018 | Portugal       | Seawall | \$ 11,957/m | 7% | (do Carmo 2018)        |
| 2018 | Portugal       | Groyne  | \$ 14,963/m | 6% | (do Carmo 2018)        |

**Table 2.** Summary of high, medium, and low values for coastal protection approaches (2018 US \$).

| Coastal Protection | High       | Low       | Mid         | Maintenance |
|--------------------|------------|-----------|-------------|-------------|
| Groyne             | \$26,064/m | \$4,317/m | \$15,190.50 | 7–6%        |
| Seawall            | \$13,061/m | \$1,601/m | \$7,331.00  | 7% to 1%    |
| Nourishment        | \$9/m3     | \$3/m3    | \$6/m3      | †           |

† Beach nourishment, in this context, is considered a hybrid capital expense and maintenance expense.

### 2.2. Projecting Vicennial Rates of Sea Level Rise

Based on data from the CoastAdapt website [1], we calculated rates of sea level rise (SLR) for vicennial time periods through to 2090, taking 2005 (the year the sand bypass become operational) as year 1. This output is reported in supplementary Table 3. Note that due to differences in the modelling behind the formulation of the RCPs, RCP4.5 records a greater rate of SLR during the 20th century [2].

**Table 3.** Rate of sea level rise (metres in time step) (IPCC, 2014).

| Time | Year | RCP 2.6 |        | RCP 4.5 |        | RCP 6.0 |        | RCP 8.5 |       |
|------|------|---------|--------|---------|--------|---------|--------|---------|-------|
|      |      | Raw     | Rate   | Raw     | Rate   | Raw     | Rate   | Raw     | Rate  |
| 2005 | 1    | 0       | 0.0056 | 0       | 0.006  | 0       | 0.0056 | 0       | 0.006 |
| 2030 | 26   | 0.14    | 0.0055 | 0.15    | 0.006  | 0.14    | 0.006  | 0.15    | 0.008 |
| 2050 | 46   | 0.25    | 0.007  | 0.27    | 0.0085 | 0.26    | 0.008  | 0.31    | 0.012 |
| 2070 | 66   | 0.39    | 0.0075 | 0.44    | 0.011  | 0.42    | 0.012  | 0.55    | 0.019 |
| 2090 | 86   | 0.54    |        | 0.66    |        | 0.66    |        | 0.93    |       |

### 2.3. Modelling Equivalent Back-Casted Sea Level Rise

We then back-casted implied SLR for each RCP. These values are reported in Table 4 (Supplementary). From this matrix of values, we estimated the implied sea level rise at the time of each project’s implementation. Sea level rise is always estimated relative to the IPCC 2005 baseline. For each project we determined the years from present over which the implied sea level rise would occur, based on the projections for the four RCPs for the Gold Coast.

**Table 4.** Modelled equivalent back-casted sea level rise under RCP scenarios.

| Year | SLR      | RCP 2.6 | RCP 4.5 | RCP 6.0 | RCP 8.5 |
|------|----------|---------|---------|---------|---------|
|      |          | Year    | Year    | Year    | Year    |
| 1960 | 0.039280 | 2012    | 2011    | 2012    | 2011    |
| 1965 | 0.157119 | 2033    | 2031    | 2032    | 2030    |
| 1970 | 0.541189 | 2090    | 2079    | 2080    | 2069    |
| 1975 | 0.951446 | 2144    | 2116    | 2114    | 2091    |
| 1980 | 1.304965 | 2191    | 2148    | 2143    | 2109    |
| 1985 | 1.518822 | 2220    | 2168    | 2161    | 2120    |
| 1990 | 1.667212 | 2240    | 2181    | 2173    | 2128    |
| 1995 | 1.854883 | 2265    | 2198    | 2189    | 2138    |

### 2.4. Economic Parameters

The final step was to estimate the present value (PV) costs of the projected (hypothetical) projects from their year of required implementation. We applied a relative low discount rate of 3%, as a mid-

point. In addition, we included additional costs to account for regular annual maintenance costs and replacement costs for assets to be replaced beyond their functional life, as follows, and summarised in Supplementary Table 4:

The functional life of a sea wall and groyne is assumed to be 100 years before complete replacement is required. These costs are factored in to replace any sea walls that need replacing. These costs are also subject to inflation.

Maintenance costs for sea walls and groynes is set at 1% per annum, in accordance with Gordon’s assumptions [3]. Maintenance is assumed to not be required for beach nourishment, as this intervention is assumed to be a maintenance option in itself.

We undertook sensitivity analysis at discount rates of 1% (a ‘social’ discount rate) and 7.5% (the rate recommended for project assessment by the Australian Government).

**Table 5.** Variables used in model.

| Variable            | Value      |       |
|---------------------|------------|-------|
| Inflation           | 1.7%       | of 1  |
| Discount            | 3%/1%/7.5% | of 1  |
| Maintenance         | 5%         | of 1  |
| Seawall/Groyne Life | 100        | years |

**References**

1. NCCARF & Australian Government, “CoastAdapt, Sea-level rise and future climate information for coastal councils. Available online: [https://coastadapt.com.au/sea-level-rise-information-all-australian-coastal-councils#QLD\\_GOLD\\_COAST](https://coastadapt.com.au/sea-level-rise-information-all-australian-coastal-councils#QLD_GOLD_COAST). (Accessed on 6 March 2020, 22 January 2020).
2. Wayne, G. (2013). The Beginner’s Guide to Representative Concentration Pathways. Retrieved from [https://skepticalscience.com/docs/RCP\\_Guide.pdf](https://skepticalscience.com/docs/RCP_Guide.pdf)
3. Gordon, A. D. (1989). Sydney’s Sea Defences. In Ninth Australasian Conference on Coastal and Ocean Engineering, 1989: Preprints of Papers (p. 149).

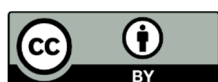

© 2020 by the authors. Submitted for possible open access publication under the terms and conditions of the Creative Commons Attribution (CC BY) license (<http://creativecommons.org/licenses/by/4.0/>).
